# Supplementary material for: Validation of Real Star® CMV PCR Kit 1.0 for the detection of cytomegalovirus in Immunocompromised Patients
Source: Research Square preprint supplement (doi:10.21203/rs.3.rs-7664929/v1), 2025-10-10
Supplement: Supplementary file 1 [file 79585790024edcc0acd00256.xlsx]

## Sheet: Common
TEST METHOD VALIDATION AND VERIFICATION - NONWAIVED TESTS
* This is a summary of common CAP requirements for the Verification/Validation of new Method/Tests * Verification/Validation of new laboratory test requires identifying the intended use of the test and establishing demonstrated evidence that provides a high degree of assurance that a test will consistently perform as expected
CAP Requiremenet	Analytical Verification/Validation	Test	Eligibility	Criteria of Verification/ Validation	Definition	Method	Qualitative	Quantitative
COM.40300	Analytical Verification	FDA Approved	FDA Approved	Analytical accuracy	Closeness of the agreement between the results of a single measurement and the true value of the analyte	1- Accuracy is verified by comparing results to a definitive or reference method, or an established comparative method. 2- Use of matrix-appropriate reference materials, patient specimens (altered or unaltered), or other commutable materials with known concentrations or activities may be used to verify accuracy. 3- The Use of routine quality control materials or calibrators used to calibrate The …	(TP+TN)/[TP+FP+TN+FN]*100	Slope Y intercepts Correlation Coefficient ( r )
				Analytical precision	Repeatability and reproducibility of results	Precision is verified by repeat measurement of samples at varying concentrations/activities within run and between run over a period of time.	TP /(TP + FP)*100	%CV Overall % CV
				Repeatability	* The closeness of agreement between results of tests performed on the same test items, by the same analyst, on the same instrument, under the same conditions in the same location and repeated over a short period of time. * It represents ‘within-run precision’.	At least six (6) measurements of the same control sample, divided into aliquots or a pooled sample, divided into aliquots. The measurements should cover the entire duration of the daily operation of the laboratory. A 15 min interval at least, is required between the six measurements.	Comparable results	Mean SD %CV Overall Mean Overall SD Overall %CV
				Rreproducibility	* The closeness of agreement between results of tests carried out on the same test items, taking into account the broadest range of variables encountered in real laboratory conditions, including different laboratories. * It represents ‘inter-laboratory precision’.2	At least six (6) measurements of the same control sample under different conditions, e.g. different days and using at least two different batches of the analyte reagents. The results of the internal quality control charts (QC) may also be used.	Comparable results	CVR%
				Reportable range [measuring interval, analytical measurement range (AMR), linear range]	The range of test result values over which the laboratory has verified accuracy of the instrument or test system measurement response. The boundaries of the reportable range are the lowest and highest analyte concentrations that generate results that are reliably produced by a test method without dilution of the specimen. The lower limit of linearity is frequently referred to as the lower limit o…	By testing a series of samples of known concentrations or a series of known dilutions of a highly elevated patient specimen or standard with concentrations across the anticipated measuring range. Equally spaced intermediate concentrations are recommended but not strictly required (8).The measured values are compared to the assigned values, typically by plotting the measured values on the y axis a…	NA	Regression Coefficient, R²
COM.40605				Reference Intervals	Reference intervals are important to allow a clinician to assess patient results against an appropriate population. The reference intervals must be established or verified for each analyte and specimen source (eg, blood, urine, cerebrospinal fluid), when appropriate
COM.40325	Analytical Verification	Internationally recognized regulatory authority	Eg. the European Union's Conformité Européenne (CE) Marking	Analytical accuracy	Same as above
				Analytical precision	Same as above
				Reportable range	Same as above
COM.40605				Renference Intervals	Same as above
				Any other performance characteristic required to ensure analytical test performance	Examples; specimen stability, reagent stability, linearity, carryover, and cross-contamination, as appropriate and applicable.	[Sheet 2]	[Sheet 2]	[Sheet 2]
COM.40350 MOL.30785 MOL.31130	Analytical Validation	Modified FDA-cleared/approved Tests and LDTs	Also Applies to : 1- Tests that are not approved by an internationally recognized regulatory authority. 2- Approved tests that have been modified by the laboratory.	Analytical accuracy	Same as above	1- For quantitative tests, a minimum of 20 samples with analyte concentrations distributed across the analytical measurement range should be used. Proportionate mixtures of samples may be used to supplement the study population. 2- For qualitative tests, a minimum of 20 samples, including positive, negative, and lowpositive samples with concentrations near the lower level of detection should be u…
				Analytical precision	Same as above
MOL.31130				Reportable range	Reportable range encompasses the full range of reported values: ● For qualitative tests that would include all reportable outcomes (eg, homozygous wild type, heterozygous or homozygous variant). ● For quantitative tests, the laboratory must define the analytical measurement range (AMR) as described in the Quantitative Assays; Calibration and Standards section of the checklist.	7 to 11 concentrations across the anticipated measuring range. To ascertain the widest possible linear range, additional samples at concentrations 20 to 30% wider than the anticipated measuring range can be used. Samples should be tested in replicates of two to our, depending on the anticipated imprecision of the assay (8). Ideally, all results for a single analyte will be obtained on the same da…	NA
COM.40605				Renference Intervals	Same as above
				Analytic sensitivity	* The lowest concentration or amount of the analyte or substance that can be measured or distinguished from a blank (lower limit of detection-LOD) * The proportion of positive results correctly identified by the test		TP/[TP+FN]*100	Mean SD
COM.40500				Analytic specificity	* The ability of a test or procedure to correctly identify or quantify an entity in the presence of interfering or cross-reactive substances that might be expected to be present (interferences) * The proportion of negative results correctly identified by the test.	Data on interferences may be obtained from manufacturers or published literature, as applicable	TN/[TN+FP]*100
				Any other performance characteristic required to ensure analytical test performance	Examples; specimen stability, reagent stability, linearity, carryover, and cross-contamination, as appropriate and applicable. [Sheet 2]	[Sheet 2]	[Sheet 2]	[Sheet 2]
Important:
* If multiple identical instruments or devices are in use, there must be records (data and written assessment) showing that the method performance specifications have been separately validated for each test and instrument or device.
* The written assessment must include an evaluation of each component of the validation study, including the acceptability of the data. If data include discordant results, there must be a record of the discordance and investigation of any impact on the approval of the test for clinical use.
* If a method is verified by someone other than the laboratory's personnel (eg, manufacturer's representative), the laboratory must have records to show that the verification correlates with in-house test performance by showing confirmation of performance specifications by the laboratory personnel testing known specimens.

## Sheet: Other characteristic
TEST METHOD VALIDATION AND VERIFICATION - NONWAIVED TESTS
CAP Requiremenet	Criteria of Verification/ Validation	Definition	Method	Qualitative	Quantitative
MOL.31251	Cut-Off	The discrete amount of analyte carried by measuring system from one sample reaction into subsequent sample reactions, thereby erroneously affecting the apparent amounts in subsequent samples.	The threshold value that distinguishes a positive from a negative result
	Truness/Bais	An estimate of a systematic measurement error.	Assessment of trueness is achieved by using control samples provided commercially, reference materials, results from interlaboratory schemes and recovery.	At least six (6) negative and six (6) positive samples with a known value should be analysed . Trueness is calculated from the ratio [true positive + true negative] / [total number of samples]. In case the kit contains both a negative and a positive control sample, these could be analyzed in duplicate for six (6) days.	is calculated by recovery experiments (mixing with control sample or calibrator with different concentrations) and measuring samples of known concentration six (6) times at least, within the same day. The %recovery (R%) and the %error (bias) are calculated, respectively. It is supplemented and monitored by participation in proficiency testing schemes.
	Diagnostic/Clinical accuracy	Comparison with known clinical diagnosis
	Method comparison		* Daily for minimum 10 days * Minimum 10 samples per category (available result) * For 2 categories minimum total of 30 samples	Agreement between data ( coefficient)
	Uncertinity			NA
	Carryover/Cross-contamination

## Sheet: New Test-Method Info
TEST METHOD VALIDATION AND VERIFICATION - NONWAIVED TESTS
Section:	MDI
New Test/Method Name:	CMV_REAL STAR
New Test/Method Category:	□ FDA Approved □ Internationally recognized regulatory authority □ FDA-Modified □ LDT
New Test/Method Category:	□ Qualitative □ Quantitative
Equipment ID:	BIORAD (1)
Objective of the verification/validation:	checking whether the specification of a new kit captures the customer's requirements,
Expected Results:
Reference Method:	Previous validated method (qiagen Artus kit)
Other Data:
Prepared By:	Zeena Shaheen, Senior MT.

## Sheet: Specimens ID-Expected result
					CUT OFF:456 Copies/ml	CUT OFF: 265 IU/ML			CUT OFF : 153 Copies/ml	CUT OFF : Copies/ml
NO.	SAMPLE ID	DATE	DESCRIPTION (QC, PT, Patient sample, etc.)	PURPOSE	Results Real Star kit Copies/ml _BIORAD	Results Real Star kit IU/ml _BIORAD	Results Real Star kit Copies/ml _ROTOR GENE	QIAGEN KIT IU/ml_ROTOR GENE REFERENCE METHOD	QIAGEN KIT Copies/ml_ROTOR GENE REFERENCE METHOD	Results Real Star kit Copies/ml _ROTOR GENE
1	V0524099	06/05/2024	PATIENT	ACCURACY	7800	4534.88	1050	2947.67	5070	3460
2	V0524283	13/05/2024	PATIENT	ACCURACY/PRECISION	187000	108721	137000	76162.8	131000	162000
3	V0524348	14/05/2024	PATIENT	ACCURACY	21500	12500	11700	11918.6	20500	16100
4	V0524350	14/05/2024	PATIENT	ACCURACY/PRECISION	2060	1197.67	1380	4994.19	8590	2646
5	V0524514	20/05/2024	PATIENT	ACCURACY	2630	1529.07	3350	2779.07	4780	4200
6	V0524522	20/05/2024	PATIENT	ACCURACY/PRECISION	33000	19186	35600	26395.3	45400	34900
7	V0524523	20/05/2024	PATIENT	ACCURACY	4020	2337.21	6240	2819.77	4850	7750
8	V0524524	20/05/2024	PATIENT	ACCURACY	29400	17093	26500	19127.9	32900	29100
9	V0524594	22/05/2024	PATIENT	ACCURACY/SENSITIVITY/LOD	56100	32616.3	44100	54651.2	94000	57500
10	V0524604	22/05/2024	PATIENT	ACCURACY	5890	3424.42	5450	4796.51	8250	4200
11	V0227220	28/05/2024	PATIENT	ACCURACY	2310	1343.02	9140	5354.65	9210	4861
12		26/01/2023	CAP	ACCURACY	3410	1982.56	2210	4465.12	7680	4480
13		31/01/2022	CAP	ACCURACY/PRECISION	43600	25348.8	45800	14593	25100	43600
14	V0624092	04/06/2024	PATIENT	ACCURACY	3040	1767.44	5095	2796.51	4810	7230
15	V0624108	04/06/2024	PATIENT	ACCURACY/PRECISION	5910	3436.05	2460	1889.53	3250	3509
16	V0624153	05/06/2024	PATIENT	ACCURACY	1210	703.488	1680	674.419	1160	833
17	V0624352	12/06/2024	PATIENT	ACCURACY	96900	56337.2	26500	45407	78100	95000
18	V0624333	12/06/2024	PATIENT	ACCURACY	6020	3500	2790	2034.88	3500	2050
19	V0624330	12/06/2024	PATIENT	ACCURACY	1450	843.023	980	598.837	1030	3190
20	V0624297	11/06/2024	PATIENT	ACCURACY	549	319.186	235	379.07	652	472
21	V0624278	11/06/2024	PATIENT	ACCURACY	5110	2970.93	9800	1244.19	2140	1400
22	V0624240	10/06/2024	PATIENT	ACCURACY	4590	2668.6	7060	5005.81	8610	2240
23	V0227301	30/05/2024	PATIENT	SPECIFICITY/REFERENCE INTERVAL	NEGATIVE	NEGATIVE	NEGATIVE	NEGATIVE	NEGATIVE	NEGATIVE	BK POSITIVE
24	V0227193	27/05/20204	PATIENT	SPECIFICITY/REFERENCE INTERVAL	NEGATIVE	NEGATIVE	NEGATIVE	NEGATIVE	NEGATIVE	NEGATIVE	HBV POSITIVE
25	V0524654	22/05/2024	PATIENT	SPECIFICITY/REFERENCE INTERVAL	NEGATIVE	NEGATIVE	NEGATIVE	NEGATIVE	NEGATIVE	NEGATIVE	HBV POSITIVE
26	V0227175	27/05/2024	PATIENT	SPECIFICITY/REFERENCE INTERVAL	NEGATIVE	NEGATIVE	NEGATIVE	NEGATIVE	NEGATIVE	NEGATIVE	EBV POSITIVE
27	V0624174	05/06/2024	PATIENT	SPECIFICITY/REFERENCE INTERVAL	NEGATIVE	NEGATIVE	NEGATIVE	NEGATIVE	NEGATIVE	NEGATIVE	EBV POSITIVE
28	V0624167	05/06/2024	PATIENT	SPECIFICITY/REFERENCE INTERVAL	NEGATIVE	NEGATIVE	NEGATIVE	NEGATIVE	NEGATIVE	NEGATIVE	EBV POSITIVE
29	V0624127	03/06/2024	PATIENT	SPECIFICITY/REFERENCE INTERVAL	NEGATIVE	NEGATIVE	NEGATIVE	NEGATIVE	NEGATIVE	NEGATIVE	HBV POSITIVE
30	V0624105	04/06/2024	PATIENT	SPECIFICITY/REFERENCE INTERVAL	NEGATIVE	NEGATIVE	NEGATIVE	NEGATIVE	NEGATIVE	NEGATIVE	ENTERO POSITIVE
31	V0624089	04/06/2024	PATIENT	SPECIFICITY/REFERENCE INTERVAL	NEGATIVE	NEGATIVE	NEGATIVE	NEGATIVE	NEGATIVE	NEGATIVE	EBV POSITIVE
32			PATIENT	SPECIFICITY/REFERENCE INTERVAL	NEGATIVE	NEGATIVE	NEGATIVE	NEGATIVE	NEGATIVE	NEGATIVE	LIPEMIC
33			PATIENT	SPECIFICITY/REFERENCE INTERVAL	NEGATIVE	NEGATIVE	NEGATIVE	NEGATIVE	NEGATIVE	NEGATIVE	ICTERIC
34	V0624071	03/06/2024	PATIENT	SPECIFICITY/REFERENCE INTERVAL	NEGATIVE	NEGATIVE	NEGATIVE	NEGATIVE	NEGATIVE	NEGATIVE	EBV POSITIVE
35	V0624054	03/06/2024	PATIENT	SPECIFICITY/REFERENCE INTERVAL	NEGATIVE	NEGATIVE	NEGATIVE	NEGATIVE	NEGATIVE	NEGATIVE	EBV POSITIVE

## Sheet: Specimens ID-Expected resul (2
						CUT OFF:456 Copies/ml	CUT OFF: 265 IU/ML			CUT OFF : 153 Copies/ml	CUT OFF : Copies/ml
NO.	SAMPLE NAME	DATE	SAMPLE ID	DESCRIPTION (QC, PT, Patient sample, etc.)	PURPOSE	Results Real Star kit Copies/ml _BIORAD	Results Real Star kit IU/ml _BIORAD	Results Real Star kit Copies/ml _ROTOR GENE	QIAGEN KIT IU/ml_ROTOR GENE REFERENCE METHOD	QIAGEN KIT Copies/ml_ROTOR GENE REFERENCE METHOD	Results Real Star kit Copies/ml _ROTOR GENE
1	SAMPLE_01	V0524099	06/05/2024	PATIENT	ACCURACY	7800	4534.88	1050	2947.67	5070	3460
2	SAMPLE_02	V0524283	13/05/2024	PATIENT	ACCURACY/PRECISION	187000	108721	137000	76162.8	131000	162000
3	SAMPLE_03	V0524348	14/05/2024	PATIENT	ACCURACY	21500	12500	11700	11918.6	20500	16100
4	SAMPLE_04	V0524350	14/05/2024	PATIENT	ACCURACY/PRECISION	2060	1197.67	1380	4994.19	8590	2646
5	SAMPLE_05	V0524514	20/05/2024	PATIENT	ACCURACY	2630	1529.07	3350	2779.07	4780	4200
6	SAMPLE_06	V0524522	20/05/2024	PATIENT	ACCURACY/PRECISION	33000	19186	35600	26395.3	45400	34900
7	SAMPLE_07	V0524523	20/05/2024	PATIENT	ACCURACY	4020	2337.21	6240	2819.77	4850	7750
8	SAMPLE_08	V0524524	20/05/2024	PATIENT	ACCURACY	29400	17093	26500	19127.9	32900	29100
9	SAMPLE_09	V0524594	22/05/2024	PATIENT	ACCURACY/SENSITIVITY/LOD	56100	32616.3	44100	54651.2	94000	57500
10	SAMPLE_10	V0524604	22/05/2024	PATIENT	ACCURACY	5890	3424.42	5450	4796.51	8250	4200
11	SAMPLE_11	V0227220	28/05/2024	PATIENT	ACCURACY	2310	1343.02	9140	5354.65	9210	4861
12	SAMPLE_12		26/01/2023	CAP	ACCURACY	3410	1982.56	2210	4465.12	7680	4480
13	SAMPLE_13		31/01/2022	CAP	ACCURACY/PRECISION	43600	25348.8	45800	14593	25100	43600
14	SAMPLE_14	V0624092	04/06/2024	PATIENT	ACCURACY	3040	1767.44	5095	2796.51	4810	7230
15	SAMPLE_15	V0624108	04/06/2024	PATIENT	ACCURACY/PRECISION	5910	3436.05	2460	1889.53	3250	3509
16	SAMPLE_16	V0624153	05/06/2024	PATIENT	ACCURACY	1210	703.488	1680	674.419	1160	833
17	SAMPLE_17	V0624352	12/06/2024	PATIENT	ACCURACY	96900	56337.2	26500	45407	78100	95000
18	SAMPLE_18	V0624333	12/06/2024	PATIENT	ACCURACY	6020	3500	2790	2034.88	3500	2050
19	SAMPLE_19	V0624330	12/06/2024	PATIENT	ACCURACY	1450	843.023	980	598.837	1030	3190
20	SAMPLE_20	V0624297	11/06/2024	PATIENT	ACCURACY	549	319.186	235	379.07	652	472
21	SAMPLE_21	V0624278	11/06/2024	PATIENT	ACCURACY	5110	2970.93	9800	1244.19	2140	1400
22	SAMPLE_22	V0624240	10/06/2024	PATIENT	ACCURACY	4590	2668.6	7060	5005.81	8610	2240
23	SAMPLE_23	V0227301	30/05/2024	PATIENT	SPECIFICITY/REFERENCE INTERVAL	NEGATIVE	NEGATIVE	NEGATIVE	NEGATIVE	NEGATIVE	NEGATIVE	BK POSITIVE
24	SAMPLE_24	V0227193	27/05/20204	PATIENT	SPECIFICITY/REFERENCE INTERVAL	NEGATIVE	NEGATIVE	NEGATIVE	NEGATIVE	NEGATIVE	NEGATIVE	HBV POSITIVE
25	SAMPLE_25	V0524654	22/05/2024	PATIENT	SPECIFICITY/REFERENCE INTERVAL	NEGATIVE	NEGATIVE	NEGATIVE	NEGATIVE	NEGATIVE	NEGATIVE	HBV POSITIVE
26	SAMPLE_26	V0227175	27/05/2024	PATIENT	SPECIFICITY/REFERENCE INTERVAL	NEGATIVE	NEGATIVE	NEGATIVE	NEGATIVE	NEGATIVE	NEGATIVE	EBV POSITIVE
27	SAMPLE_27	V0624174	05/06/2024	PATIENT	SPECIFICITY/REFERENCE INTERVAL	NEGATIVE	NEGATIVE	NEGATIVE	NEGATIVE	NEGATIVE	NEGATIVE	EBV POSITIVE
28	SAMPLE_28	V0624167	05/06/2024	PATIENT	SPECIFICITY/REFERENCE INTERVAL	NEGATIVE	NEGATIVE	NEGATIVE	NEGATIVE	NEGATIVE	NEGATIVE	EBV POSITIVE
29	SAMPLE_29	V0624127	03/06/2024	PATIENT	SPECIFICITY/REFERENCE INTERVAL	NEGATIVE	NEGATIVE	NEGATIVE	NEGATIVE	NEGATIVE	NEGATIVE	HBV POSITIVE
30	SAMPLE_30	V0624105	04/06/2024	PATIENT	SPECIFICITY/REFERENCE INTERVAL	NEGATIVE	NEGATIVE	NEGATIVE	NEGATIVE	NEGATIVE	NEGATIVE	ENTERO POSITIVE
31	SAMPLE_31	V0624089	04/06/2024	PATIENT	SPECIFICITY/REFERENCE INTERVAL	NEGATIVE	NEGATIVE	NEGATIVE	NEGATIVE	NEGATIVE	NEGATIVE	EBV POSITIVE
32	SAMPLE_32			PATIENT	SPECIFICITY/REFERENCE INTERVAL	NEGATIVE	NEGATIVE	NEGATIVE	NEGATIVE	NEGATIVE	NEGATIVE	LIPEMIC
33	SAMPLE_33			PATIENT	SPECIFICITY/REFERENCE INTERVAL	NEGATIVE	NEGATIVE	NEGATIVE	NEGATIVE	NEGATIVE	NEGATIVE	ICTERIC
34	SAMPLE_34	V0624071	03/06/2024	PATIENT	SPECIFICITY/REFERENCE INTERVAL	NEGATIVE	NEGATIVE	NEGATIVE	NEGATIVE	NEGATIVE	NEGATIVE	EBV POSITIVE
35	SAMPLE_35	V0624054	03/06/2024	PATIENT	SPECIFICITY/REFERENCE INTERVAL	NEGATIVE	NEGATIVE	NEGATIVE	NEGATIVE	NEGATIVE	NEGATIVE	EBV POSITIVE

## Sheet: Accuracy
ACCURACY
Item	Data	SAMPLE NAME	SAMPLE ID	DATE	DESCRIPTION (QC, PT, Patient sample, etc.)	PURPOSE	Results Real Star kit Copies/ml _BIORAD	Results Real Star kit IU/ml _BIORAD	QIAGEN KIT Copies/ml_ROTOR GENE REFERENCE METHOD	QIAGEN KIT IU/ml_ROTOR GENE REFERENCE METHOD
Number/Info of samples	22 positive Whole Blood Samples were used for accuracy validation 14 negative Whole Blood	SAMPLE_01	V0524099	06/05/2024	PATIENT	ACCURACY	7800	4534.88	5070	2947.67
Analytical Accuracy Study Design	A comparison of methods study By using proficiency testing samples and patients samples with known results that performed with previous validated method.	SAMPLE_02	V0524283	13/05/2024	PATIENT	ACCURACY	187000	108721	131000	76162.8
Data analysis	The Realstar CMV PCR Kit was compared to the Qiagen Artus CMV. DNA was isolated using the QIAamp DSP Virus Kit, and analysis was carried out on the Biorad CFX 96 (1) Instrument. For comparative testing the results obtained by using the artus CMV RG PCR Kit were compared to those of theRealStar CMV Assay. In comparison to the results collected with the Qiagen Artus CMV Assay as a reference assay, …	SAMPLE_03	V0524348	14/05/2024	PATIENT	ACCURACY	21500	12500	20500	11918.6
Criteria for acceptance	Rule of Thumb for Interpreting the Size of a Correlation Coefficient refer to NIH https://www.ncbi.nlm.nih.gov/pmc/articles/PMC3576830/ Size of Correlation Interpretation 0.90 to 1.00 : Very high positive (negative) correlation 0.70 to 0.90 : High positive (negative) correlation 0.50 to 0.70 :Moderate positive (negative) correlation 0.30 to 0.50 : Low positive (negative) correlation 0.00 to 0.30 …	SAMPLE_04	V0524350	14/05/2024	PATIENT	ACCURACY	2060	1197.67	8590	4994.19
Other Notes		SAMPLE_05	V0524514	20/05/2024	PATIENT	ACCURACY	2630	1529.07	4780	2779.07
References	https://www.ncbi.nlm.nih.gov/pmc/articles/PMC3576830/	SAMPLE_06	V0524522	20/05/2024	PATIENT	ACCURACY	33000	19186	45400	26395.3
		SAMPLE_07	V0524523	20/05/2024	PATIENT	ACCURACY	4020	2337.21	4850	2819.77
		SAMPLE_08	V0524524	20/05/2024	PATIENT	ACCURACY	29400	17093	32900	19127.9
		SAMPLE_09	V0524594	22/05/2024	PATIENT	ACCURACY	56100	32616.3	94000	54651.2
		SAMPLE_10	V0524604	22/05/2024	PATIENT	ACCURACY	5890	3424.42	8250	4796.51
		SAMPLE_11	V0227220	28/05/2024	PATIENT	ACCURACY	2310	1343.02	9210	5354.65
		SAMPLE_12		26/01/2023	CAP	ACCURACY	2410	1401.16	5992.5	3484.01
		SAMPLE_13		31/01/2022	CAP	ACCURACY	43600	25348.8	60350	35087.2
		SAMPLE_14	V0624092	04/06/2024	PATIENT	ACCURACY	3040	1767.44	4810	2796.51
		SAMPLE_15	V0624108	04/06/2024	PATIENT	ACCURACY	5910	3436.05	3250	1889.53
		SAMPLE_16	V0624153	05/06/2024	PATIENT	ACCURACY	1210	703.488	1160	674.419
		SAMPLE_17	V0624352	12/06/2024	PATIENT	ACCURACY	96900	56337.2	78100	45407
		SAMPLE_18	V0624333	12/06/2024	PATIENT	ACCURACY	6020	3500	3500	2034.88
		SAMPLE_19	V0624330	12/06/2024	PATIENT	ACCURACY	1450	843.023	1030	598.837
		SAMPLE_21	V0624278	11/06/2024	PATIENT	ACCURACY	5110	2970.93	2140	1244.19
		SAMPLE_22	V0624240	10/06/2024	PATIENT	ACCURACY	4590	2668.6	8610	5005.81
											correlation coefficient R
											0.93374
		SAMPLE_23	V0227301	30/05/2024	PATIENT	ACCURACY	NEGATIVE	NEGATIVE		NEGATIVE
		SAMPLE_24	V0227193	27/05/20204	PATIENT	ACCURACY	NEGATIVE	NEGATIVE		NEGATIVE
		SAMPLE_25	V0524654	22/05/2024	PATIENT	ACCURACY	NEGATIVE	NEGATIVE		NEGATIVE
		SAMPLE_26	V0227175	27/05/2024	PATIENT	ACCURACY	NEGATIVE	NEGATIVE		NEGATIVE
		SAMPLE_27	V0624174	05/06/2024	PATIENT	ACCURACY	NEGATIVE	NEGATIVE		NEGATIVE
		SAMPLE_28	V0624167	05/06/2024	PATIENT	ACCURACY	NEGATIVE	NEGATIVE		NEGATIVE
		SAMPLE_29	V0624127	03/06/2024	PATIENT	ACCURACY	NEGATIVE	NEGATIVE		NEGATIVE
		SAMPLE_30	V0624105	04/06/2024	PATIENT	ACCURACY	NEGATIVE	NEGATIVE		NEGATIVE
		SAMPLE_31	V0624089	04/06/2024	PATIENT	ACCURACY	NEGATIVE	NEGATIVE		NEGATIVE
		SAMPLE_32			PATIENT	ACCURACY	NEGATIVE	NEGATIVE		NEGATIVE
		SAMPLE_33			PATIENT	ACCURACY	NEGATIVE	NEGATIVE		NEGATIVE
		SAMPLE_34	V0624071	03/06/2024	PATIENT	ACCURACY	NEGATIVE	NEGATIVE		NEGATIVE
		SAMPLE_35	V0624054	03/06/2024	PATIENT	ACCURACY	NEGATIVE	NEGATIVE		NEGATIVE

## Sheet: Precision
PRECISION
Item	Data	SAMPLE ID	DESCRIPTION (QC, PT, Patient sample, etc.)	PURPOSE	FIRST RUN COPIES/ML	FIRST RUN IU/ML	SECOND RUN COPIES/ML	SECOND RUN IU/ML	THIRD RUN COPIES/ML	THIRD RUN IU/ML	Expected Result QIAGEN KIT Copies/ml	Expected Result QIAGEN KIT IU/ml
Number/Info of samples	8 Whole Blood Samples were used for repeatability validation. 20 Whole Blood Samples were used for reproducibility validation.	SAMPLE_13	CAP	REPRODUCIBILITY	43600	25348.8	36400	21162.8	24100	14011.6	25100	14593
Analytical Precision Study Design	Repeat measurement of samples at varying concentrations within run and between runs over a period of time. Multiple estimations in replicates under particular conditions which could be similar or changed . These conditions could be the same method, by the same operator, on the same instrument, within the same laboratory, using the same reagent materials within a short period(the same day) which r…	SAMPLE_02	V0524283	REPRODUCIBILITY	187000	108721	193000	112209	130000	75581.4	131000	76162.8	Repeat measurement of samples at varying concentrations between three runs by different operators.
Data analysis	The Realstar CMV PCR Kit was compared to the Qiagen Artus CMV. DNA was isolated using the QIAamp DSP Virus Kit, and analysis was carried out on theBiorad cfx 96 (1) Instrument. For comparative testing, the results obtained by using the artus CMV RG PCR Kit were compared to those of the RealStar CMV Assay. In comparison to the results collected with the Qiagen Artus CMV Assay as a reference assay,…	SAMPLE_06	V0524522	REPRODUCIBILITY	33000	19186	62600	36395.3	34800	20232.6	45400	26395.3
Criteria for acceptance	CV MUST BE <5.0 Refer to : https://www.westgard.com/lessons/z-stats-basic-statistics/73-lesson34.html#:~:text=CVs%20of%205%25%20or%20less,the%20CV%20may%20be%20low.	SAMPLE_04	V0524350	REPRODUCIBILITY	5060	2941.86	8190	4761.63	6200	3604.65	8590	4994.19
Other Notes		SAMPLE_04 1/2	V0524350	REPRODUCIBILITY			1020	593.023	1190	691.86	880	511.628
References	https://www.westgard.com/lessons/z-stats-basic-statistics/73-	SAMPLE_04 1/2	V0524350	REPRODUCIBILITY			1100	639.535	1080	627.907	880	511.628	MEAN	3450
		SAMPLE_04 1/2	V0524350	REPRODUCIBILITY			789	458.721	985	572.674	880	511.628	STDDEV	4451.37
		SAMPLE_21	V0624278	REPRODUCIBILITY	5910	3436.05	4895	2845.93	4120	2395.35	3250	1889.53	CV	1.29025
						1 read		2nd read		at the same run
		SAMPLE_13	CAP	REPEATABILITY	43600	25348.8	17500	10174.4			25100	14593	Repeat measurement of samples at varying concentrations within the same run by same techonologist
		SAMPLE_02	V0524283	REPEATABILITY	187000	108721	145000	84302.3			131000	76162.8
		SAMPLE_06	V0524522	REPEATABILITY	33000	19186	33500	19476.7			45400	26395.3
		SAMPLE_04	V0524350	REPEATABILITY	2060	1197.67	7190	4180.23			8590	4994.19
		SAMPLE_05	V0524514	REPEATABILITY	3350	1947.67	5264	3060.47			4780	2779.07
		SAMPLE_04	V0524350	REPEATABILITY	2060	1197.67	3280	1906.98			8590	4994.19
		SAMPLE_04 1/2	V0524350	REPEATABILITY	1120	651.163	690	401.163			880	511.628
		SAMPLE_04 1/2	V0524350	REPEATABILITY	958	556.977	913	530.814			880	511.628
		SAMPLE_04 1/2	V0524350	REPEATABILITY	989	575	741	430.814			880	511.628
		SAMPLE_21	V0624278	REPEATABILITY	4210	2447.67	3589	2086.63			3250	1889.53
		SAMPLE_09 DILUTED	V0524594	REPEATABILITY	2430	1412.79	2510	1459.3			1800	1046.51
		SAMPLE_09 DILUTED	V0524594	REPEATABILITY	2150	1250	1300	755.814			1800	1046.51
		SAMPLE_09 DILUTED	V0524594	REPEATABILITY	2110	1226.74	2310	1343.02			1800	1046.51
		SAMPLE_09 DILUTED	V0524594	REPEATABILITY	1110	645.349	1080	627.907			1800	1046.51
		SAMPLE_09 DILUTED	V0524594	REPEATABILITY	1290	750	1620	941.86			1800	1046.51
													MEAN	15890
													STDDEV	34084.2
													CV	2.14501

## Sheet: Reportable range
REPORTABLE RANGE
Item	Data		SAMPLE ID	DESCRIPTION (QC, PT, Patient sample, etc.)	PURPOSE	CALCULATED RESULTS Real Star kit Copies/ml	CALCULATED RESULTS Real Star kit IU/ml	Expected Result COPIES/ml	Expected Result IU/ml
Number/Info of samples	19 reads of standards were used for Reportable range validation		QS 1	STANDARD CALIBRATORS	REPORTABLE RANGE	17200000	10000000	17200000	10000000
Reportable Range Study Design	By testing a series of standards and do serial dilution for the lowest std to reach a concentrations across the anticipated measuring range. The measured values are compared to the assigned values, typically by plotting the measured values on the y axis and the assigned values on the x axis.		QS 2	STANDARD CALIBRATORS	REPORTABLE RANGE	1720000	1000000	1720000	1000000
Data analysis	The measured values are compared to the assigned values, typically by plotting the measured values on the y axis and the assigned values on the x axis. Calculate Regression Coefficient, R². R²: 0.999 (ACCEPTED VALUE)		QS 3	STANDARD CALIBRATORS	REPORTABLE RANGE	172000	100000	172000	100000
Criteria for acceptance	An R2 of 1.0 indicates that the data perfectly fit the linear model REFER TO https://www.ncbi.nlm.nih.gov/pmc/articles/PMC4678365/		QS 4	STANDARD CALIBRATORS	REPORTABLE RANGE	17200	10000	17200	10000
Other Notes			CMV S4 1/2 _1	STANDARD CALIBRATORS	REPORTABLE RANGE	6480	3767.44	8600	5000
References	https://www.ncbi.nlm.nih.gov/pmc/articles/PMC4678365/		CMV S4 1/2 _1	STANDARD CALIBRATORS	REPORTABLE RANGE	5090	2959.3	8600	5000
			CMV S4 1/2 _1	STANDARD CALIBRATORS	REPORTABLE RANGE	6050	3517.44	8600	5000
			CMV S4 1/2 _2	STANDARD CALIBRATORS	REPORTABLE RANGE	2140	1244.19	4300	2500
			CMV S4 1/2 _2	STANDARD CALIBRATORS	REPORTABLE RANGE	3130	1819.77	4300	2500
			CMV S4 1/2 _2	STANDARD CALIBRATORS	REPORTABLE RANGE	3350	1947.67	4300	2500
			CMV S4 1/2 _3	STANDARD CALIBRATORS	REPORTABLE RANGE	1190	691.86	2150	1250
			CMV S4 1/2 _3	STANDARD CALIBRATORS	REPORTABLE RANGE	1009	586.628	2150	1250
			CMV S4 1/2 _3	STANDARD CALIBRATORS	REPORTABLE RANGE	1160	674.419	2150	1250
			CMV S4 1/2 _4	STANDARD CALIBRATORS	REPORTABLE RANGE	1023	594.767	1075	625
			CMV S4 1/2 _4	STANDARD CALIBRATORS	REPORTABLE RANGE	1170	680.233	1075	625
			CMV S4 1/2 _4	STANDARD CALIBRATORS	REPORTABLE RANGE	901	523.837	1075	625
			CMV S4 1/2.3 _5	STANDARD CALIBRATORS	REPORTABLE RANGE	465	270.349	456	265.116
			CMV S4 1/2.3 _5	STANDARD CALIBRATORS	REPORTABLE RANGE	666	387.209	456	265.116
			CMV S4 1/2.3 _5	STANDARD CALIBRATORS	REPORTABLE RANGE	406	236.047	456	265.116
			CMV S4 1/2 _6	STANDARD CALIBRATORS	REPORTABLE RANGE	0	0	268.9	156.337
			CMV S4 1/2 _6	STANDARD CALIBRATORS	REPORTABLE RANGE	0	0	268.9	156.337
			CMV S4 1/2 _6	STANDARD CALIBRATORS	REPORTABLE RANGE	0	0	268.9	156.337	Regression Coefficient, R²
										1

## Sheet: Reference Intervals
REFERENCE INTERVAL
Item	Data		SAMPLE ID	DESCRIPTION (QC, PT, Patient sample, etc.)	PURPOSE	Results Real Star kit IU/ml	Expected Result QIAGEN KIT IU/ml
Number/Info of samples	13 Whole Blood Samples were used for Reference Range validation		SAMPLE_23	PATIENT	REFERENCE INTERVAL	NEGATIVE	NEGATIVE
Reference Interval Study Design	Perform assay on normal controls, from individuals who don’t have the disease.		SAMPLE_24	PATIENT	REFERENCE INTERVAL	NEGATIVE	NEGATIVE
Data analysis	All samples results were negative as expected.		SAMPLE_25	PATIENT	REFERENCE INTERVAL	NEGATIVE	NEGATIVE
Criteria for acceptance	Gave results as normal individuals.		SAMPLE_26	PATIENT	REFERENCE INTERVAL	NEGATIVE	NEGATIVE
Other Notes			SAMPLE_27	PATIENT	REFERENCE INTERVAL	NEGATIVE	NEGATIVE
References	https://digital.seracare.com/assay-ver-wp		SAMPLE_28	PATIENT	REFERENCE INTERVAL	NEGATIVE	NEGATIVE
			SAMPLE_29	PATIENT	REFERENCE INTERVAL	NEGATIVE	NEGATIVE
			SAMPLE_30	PATIENT	REFERENCE INTERVAL	NEGATIVE	NEGATIVE
			SAMPLE_31	PATIENT	REFERENCE INTERVAL	NEGATIVE	NEGATIVE
			SAMPLE_32	PATIENT	REFERENCE INTERVAL	NEGATIVE	NEGATIVE
			SAMPLE_33	PATIENT	REFERENCE INTERVAL	NEGATIVE	NEGATIVE
			SAMPLE_34	PATIENT	REFERENCE INTERVAL	NEGATIVE	NEGATIVE
			SAMPLE_35	PATIENT	REFERENCE INTERVAL	NEGATIVE	NEGATIVE

## Sheet: Sensitivity
SENSITIVITY
Item	Data		SAMPLE ID	DESCRIPTION (QC, PT, Patient sample, etc.)	PURPOSE	Results Real Star kit Copies/ml	Expected Result
Number/Info of samples	125 reads from Whole Blood Sample and the lowest satandard were used for Sensitivity validation		QS 4	STANDARD CALIBRATORS	SENSITIVITY	17200	17200
Analytic sensitivity Study Design	By testing a serial dilution of sample with a known concentration of the target substance and the lowest standard until reach the LOD . Results should be compared with those of a gold-standard reference .		CMV S4 1/2 _1	STANDARD CALIBRATORS	SENSITIVITY	6480	8600
Data analysis	Serial dilution for Patient' sample and the lowest standard with known concentration were done and performed using realstar kit . After analysis an expected values from each dilution were given .		CMV S4 1/2 _1	STANDARD CALIBRATORS	SENSITIVITY	5090	8600
Criteria for acceptance	results of samples after dilution gave the results from the highest value to the lowest value the can be detected by a kit. lowest value that can be detected with confidence 80% is 456 copies/ml		CMV S4 1/2 _1	STANDARD CALIBRATORS	SENSITIVITY	6050	8600
Other Notes			CMV S4 1/2 _2	STANDARD CALIBRATORS	SENSITIVITY	3140	4300
References			CMV S4 1/2 _2	STANDARD CALIBRATORS	SENSITIVITY	3130	4300
			CMV S4 1/2 _2	STANDARD CALIBRATORS	SENSITIVITY	3350	4300
			CMV S4 1/2 _3	STANDARD CALIBRATORS	SENSITIVITY	2190	2150
			CMV S4 1/2 _3	STANDARD CALIBRATORS	SENSITIVITY	2100	2150
			CMV S4 1/2 _3	STANDARD CALIBRATORS	SENSITIVITY	1860	2150
			CMV S4 1/2 _4	STANDARD CALIBRATORS	SENSITIVITY	1023	1075
			CMV S4 1/2 _4	STANDARD CALIBRATORS	SENSITIVITY	1170	1075
			CMV S4 1/2 _4	STANDARD CALIBRATORS	SENSITIVITY	901	1075
			CMV S4 1/2.3 _5	STANDARD CALIBRATORS	SENSITIVITY	465	465
			CMV S4 1/2.3 _5	STANDARD CALIBRATORS	SENSITIVITY	666	465
			CMV S4 1/2.3 _5	STANDARD CALIBRATORS	SENSITIVITY	406	465
			CMV S4 1/2 _6	STANDARD CALIBRATORS	SENSITIVITY	0	268.9
			CMV S4 1/2 _6	STANDARD CALIBRATORS	SENSITIVITY	0	268.9
			CMV S4 1/2 _6	STANDARD CALIBRATORS	SENSITIVITY	0	268.9
			SAMPLE_09	PATIENT SAMPLE	SENSITIVITY	5600
			SAMPLE_09_DILUTED TO 1047 IU/ML	PATIENT SAMPLE	SENSITIVITY	2430	1046.51
			SAMPLE_09_DILUTED TO 1047 IU/ML	PATIENT SAMPLE	SENSITIVITY	2150	1046.51
			SAMPLE_09_DILUTED TO 1047 IU/ML	PATIENT SAMPLE	SENSITIVITY	2110	1046.51
			SAMPLE_09_DILUTED TO 1047 IU/ML	PATIENT SAMPLE	SENSITIVITY	1110	1046.51
			SAMPLE_09_DILUTED TO 1047 IU/ML	PATIENT SAMPLE	SENSITIVITY	1290	1046.51
			SAMPLE_09_DILUTED TO 1047 IU/ML	PATIENT SAMPLE	SENSITIVITY	2010	1046.51
			SAMPLE_09_DILUTED TO 1047 IU/ML	PATIENT SAMPLE	SENSITIVITY	1300	1046.51
			SAMPLE_09_DILUTED TO 1047 IU/ML	PATIENT SAMPLE	SENSITIVITY	1310	1046.51
			SAMPLE_09_DILUTED TO 1047 IU/ML	PATIENT SAMPLE	SENSITIVITY	1080	1046.51
			SAMPLE_09_DILUTED TO 1047 IU/ML	PATIENT SAMPLE	SENSITIVITY	1620	1046.51
			SAMPLE_09_DILUTED TO 523 IU/ML	PATIENT SAMPLE	SENSITIVITY	1130	523
			SAMPLE_09_DILUTED TO 523 IU/ML	PATIENT SAMPLE	SENSITIVITY	1210	523
			SAMPLE_09_DILUTED TO 523 IU/ML	PATIENT SAMPLE	SENSITIVITY	1520	523
			SAMPLE_09_DILUTED TO 523 IU/ML	PATIENT SAMPLE	SENSITIVITY	1010	523
			SAMPLE_09_DILUTED TO 523 IU/ML	PATIENT SAMPLE	SENSITIVITY	1260	523
			SAMPLE_09_DILUTED TO 523 IU/ML	PATIENT SAMPLE	SENSITIVITY	1170	523
			SAMPLE_09_DILUTED TO 523 IU/ML	PATIENT SAMPLE	SENSITIVITY	1070	523
			SAMPLE_09_DILUTED TO 523 IU/ML	PATIENT SAMPLE	SENSITIVITY	1542	523
			SAMPLE_09_DILUTED TO 523 IU/ML	PATIENT SAMPLE	SENSITIVITY	717	523
			SAMPLE_09_DILUTED TO 523 IU/ML	PATIENT SAMPLE	SENSITIVITY	776	523
			SAMPLE_09_DILUTED TO 419 IU/ML	PATIENT SAMPLE	SENSITIVITY	419	419
			SAMPLE_09_DILUTED TO 419 IU/ML	PATIENT SAMPLE	SENSITIVITY	979	419
			SAMPLE_09_DILUTED TO 419 IU/ML	PATIENT SAMPLE	SENSITIVITY	600	419
			SAMPLE_09_DILUTED TO 419 IU/ML	PATIENT SAMPLE	SENSITIVITY	841	419
			SAMPLE_09_DILUTED TO 419 IU/ML	PATIENT SAMPLE	SENSITIVITY	857	419
			SAMPLE_09_DILUTED TO 419 IU/ML	PATIENT SAMPLE	SENSITIVITY	402	419
			SAMPLE_09_DILUTED TO 419 IU/ML	PATIENT SAMPLE	SENSITIVITY	745	419
			SAMPLE_09_DILUTED TO 419 IU/ML	PATIENT SAMPLE	SENSITIVITY	460	419
			SAMPLE_09_DILUTED TO 419 IU/ML	PATIENT SAMPLE	SENSITIVITY	645	419
			SAMPLE_09_DILUTED TO 419 IU/ML	PATIENT SAMPLE	SENSITIVITY	969	419
			SAMPLE_09_DILUTED TO 419 IU/ML	PATIENT SAMPLE	SENSITIVITY	1170	419
			SAMPLE_09_DILUTED TO 419 IU/ML	PATIENT SAMPLE	SENSITIVITY	941	419
			SAMPLE_09_DILUTED TO 419 IU/ML	PATIENT SAMPLE	SENSITIVITY	1020	419
			SAMPLE_09_DILUTED TO 419 IU/ML	PATIENT SAMPLE	SENSITIVITY	687	419
			SAMPLE_09_DILUTED TO 419 IU/ML	PATIENT SAMPLE	SENSITIVITY	2200	419
			SAMPLE_09_DILUTED TO 419 IU/ML	PATIENT SAMPLE	SENSITIVITY	317	419
			SAMPLE_09_DILUTED TO 419 IU/ML	PATIENT SAMPLE	SENSITIVITY	1100	419
			SAMPLE_09_DILUTED TO 419 IU/ML	PATIENT SAMPLE	SENSITIVITY	629	419
			SAMPLE_09_DILUTED TO 419 IU/ML	PATIENT SAMPLE	SENSITIVITY	662	419
			SAMPLE_09_DILUTED TO 419 IU/ML	PATIENT SAMPLE	SENSITIVITY	1050	419
			SAMPLE_09_DILUTED TO 419 IU/ML	PATIENT SAMPLE	SENSITIVITY	609	419
			SAMPLE_09_DILUTED TO 419 IU/ML	PATIENT SAMPLE	SENSITIVITY	1150	419
			SAMPLE_09_DILUTED TO 291 IU/ML	PATIENT SAMPLE	SENSITIVITY	640	291
			SAMPLE_09_DILUTED TO 291 IU/ML	PATIENT SAMPLE	SENSITIVITY	352	291
			SAMPLE_09_DILUTED TO 291 IU/ML	PATIENT SAMPLE	SENSITIVITY	315	291
			SAMPLE_09_DILUTED TO 291 IU/ML	PATIENT SAMPLE	SENSITIVITY	525	291
			SAMPLE_09_DILUTED TO 291 IU/ML	PATIENT SAMPLE	SENSITIVITY	291	291
			SAMPLE_09_DILUTED TO 291 IU/ML	PATIENT SAMPLE	SENSITIVITY	512	291
			SAMPLE_09_DILUTED TO 291 IU/ML	PATIENT SAMPLE	SENSITIVITY	760	291
			SAMPLE_09_DILUTED TO 291 IU/ML	PATIENT SAMPLE	SENSITIVITY	452	291
			SAMPLE_09_DILUTED TO 291 IU/ML	PATIENT SAMPLE	SENSITIVITY	315	291
			SAMPLE_09_DILUTED TO 291 IU/ML	PATIENT SAMPLE	SENSITIVITY	241	291
			SAMPLE_09_DILUTED TO 291 IU/ML	PATIENT SAMPLE	SENSITIVITY	380	291
			SAMPLE_09_DILUTED TO 291 IU/ML	PATIENT SAMPLE	SENSITIVITY	761	291
			SAMPLE_09_DILUTED TO 291 IU/ML	PATIENT SAMPLE	SENSITIVITY	763	291
			SAMPLE_09_DILUTED TO 291 IU/ML	PATIENT SAMPLE	SENSITIVITY	502	291
			SAMPLE_09_DILUTED TO 291 IU/ML	PATIENT SAMPLE	SENSITIVITY	574	291
			SAMPLE_09_DILUTED TO 291 IU/ML	PATIENT SAMPLE	SENSITIVITY	451	291
			SAMPLE_09_DILUTED TO 291 IU/ML	PATIENT SAMPLE	SENSITIVITY	315	291
			SAMPLE_09_DILUTED TO 291 IU/ML	PATIENT SAMPLE	SENSITIVITY	1610	291
			SAMPLE_09_DILUTED TO 291 IU/ML	PATIENT SAMPLE	SENSITIVITY	643	291
			SAMPLE_09_DILUTED TO 291 IU/ML	PATIENT SAMPLE	SENSITIVITY	1090	291
			SAMPLE_09_DILUTED TO 291 IU/ML	PATIENT SAMPLE	SENSITIVITY	570	291
			SAMPLE_09_DILUTED TO 291 IU/ML	PATIENT SAMPLE	SENSITIVITY	554	291
			SAMPLE_09_DILUTED TO 291 IU/ML	PATIENT SAMPLE	SENSITIVITY	594	291
			SAMPLE_09_DILUTED TO 291 IU/ML	PATIENT SAMPLE	SENSITIVITY	269	291
			SAMPLE_09_DILUTED TO 291 IU/ML	PATIENT SAMPLE	SENSITIVITY	573	291
			SAMPLE_09_DILUTED TO 291 IU/ML	PATIENT SAMPLE	SENSITIVITY	980	291
			SAMPLE_09_DILUTED TO 291 IU/ML	PATIENT SAMPLE	SENSITIVITY	182	291
			SAMPLE_09_DILUTED TO 291 IU/ML	PATIENT SAMPLE	SENSITIVITY	366	291
			SAMPLE_09_DILUTED TO 265 IU/ML	PATIENT SAMPLE	SENSITIVITY	740	265
			SAMPLE_09_DILUTED TO 265 IU/ML	PATIENT SAMPLE	SENSITIVITY	323	265
			SAMPLE_09_DILUTED TO 265 IU/ML	PATIENT SAMPLE	SENSITIVITY	574	265
			SAMPLE_09_DILUTED TO 265 IU/ML	PATIENT SAMPLE	SENSITIVITY	765	265
			SAMPLE_09_DILUTED TO 265 IU/ML	PATIENT SAMPLE	SENSITIVITY	362	265
			SAMPLE_09_DILUTED TO 265 IU/ML	PATIENT SAMPLE	SENSITIVITY	588	265
			SAMPLE_09_DILUTED TO 265 IU/ML	PATIENT SAMPLE	SENSITIVITY	768	265
			SAMPLE_09_DILUTED TO 265 IU/ML	PATIENT SAMPLE	SENSITIVITY	751	265
			SAMPLE_09_DILUTED TO 265 IU/ML	PATIENT SAMPLE	SENSITIVITY	784	265
			SAMPLE_09_DILUTED TO 265 IU/ML	PATIENT SAMPLE	SENSITIVITY	242	265
			SAMPLE_09_DILUTED TO 265 IU/ML	PATIENT SAMPLE	SENSITIVITY	387	265
			SAMPLE_09_DILUTED TO 265 IU/ML	PATIENT SAMPLE	SENSITIVITY	426	265
			SAMPLE_09_DILUTED TO 265 IU/ML	PATIENT SAMPLE	SENSITIVITY	305	265
			SAMPLE_09_DILUTED TO 265 IU/ML	PATIENT SAMPLE	SENSITIVITY	315	265
			SAMPLE_09_DILUTED TO 265 IU/ML	PATIENT SAMPLE	SENSITIVITY	289	265
			SAMPLE_09_DILUTED TO 265 IU/ML	PATIENT SAMPLE	SENSITIVITY	0	265
			SAMPLE_09_DILUTED TO 265 IU/ML	PATIENT SAMPLE	SENSITIVITY	0	265
			SAMPLE_09_DILUTED TO 265 IU/ML	PATIENT SAMPLE	SENSITIVITY	0	265
			SAMPLE_09_DILUTED TO 265 IU/ML	PATIENT SAMPLE	SENSITIVITY	324	265
			SAMPLE_09_DILUTED TO 265 IU/ML	PATIENT SAMPLE	SENSITIVITY	354	265
			SAMPLE_09_DILUTED TO 265 IU/ML	PATIENT SAMPLE	SENSITIVITY	0	265
			SAMPLE_09_DILUTED TO 265 IU/ML	PATIENT SAMPLE	SENSITIVITY	0	265
			SAMPLE_09_DILUTED TO 265 IU/ML	PATIENT SAMPLE	SENSITIVITY	242	265
			SAMPLE_09_DILUTED TO 265 IU/ML	PATIENT SAMPLE	SENSITIVITY	387	265
			SAMPLE_09_DILUTED TO 265 IU/ML	PATIENT SAMPLE	SENSITIVITY	426	265
			SAMPLE_09_DILUTED TO 207 IU/ML	PATIENT SAMPLE	SENSITIVITY	0	207
			SAMPLE_09_DILUTED TO 207 IU/ML	PATIENT SAMPLE	SENSITIVITY	0	207
			SAMPLE_09_DILUTED TO 207 IU/ML	PATIENT SAMPLE	SENSITIVITY	0	207
			SAMPLE_09_DILUTED TO 207 IU/ML	PATIENT SAMPLE	SENSITIVITY	0	207
			SAMPLE_09_DILUTED TO 207 IU/ML	PATIENT SAMPLE	SENSITIVITY	0	207
			SAMPLE_09_DILUTED TO 207 IU/ML	PATIENT SAMPLE	SENSITIVITY	0	207
			SAMPLE_09_DILUTED TO 207 IU/ML	PATIENT SAMPLE	SENSITIVITY	0	207
			SAMPLE_09_DILUTED TO 207 IU/ML	PATIENT SAMPLE	SENSITIVITY	0	207
			SAMPLE_09_DILUTED TO 207 IU/ML	PATIENT SAMPLE	SENSITIVITY	0	207
			SAMPLE_09_DILUTED TO 207 IU/ML	PATIENT SAMPLE	SENSITIVITY	0	207
				BIORAD		%	95% CI.
				SAMPLE 1800	10 FROM 10	1
				SAMPLE 900	9 FROM 10	0.9	779-2286
				SAMPLE 720	23 FROM 25	0.92	601-1017
				SAMPLE 500	20 FROM 25	0.8	306-699
				SAMPLE 456	20 FROM 25	0.8	301 - 546
				SAMPLE 365	0 FROM 10	0

[truncated: 6 more sheets: Sensitivity (2), Specificity, Other Criteria, Reagent Stability, linearity, Section-Specific Criteria]
